# Supplementary material for: Lycorine inhibits angiogenesis by docking to PDGFRα
Source: PubMed Central journal article supplement (PMC9364594; doi:10.1186/s12885-022-09929-y), 2022-08-10
Supplement: 12885_2022_9929_MOESM2_ESM.pdf [file 12885_2022_9929_MOESM2_ESM.pdf]

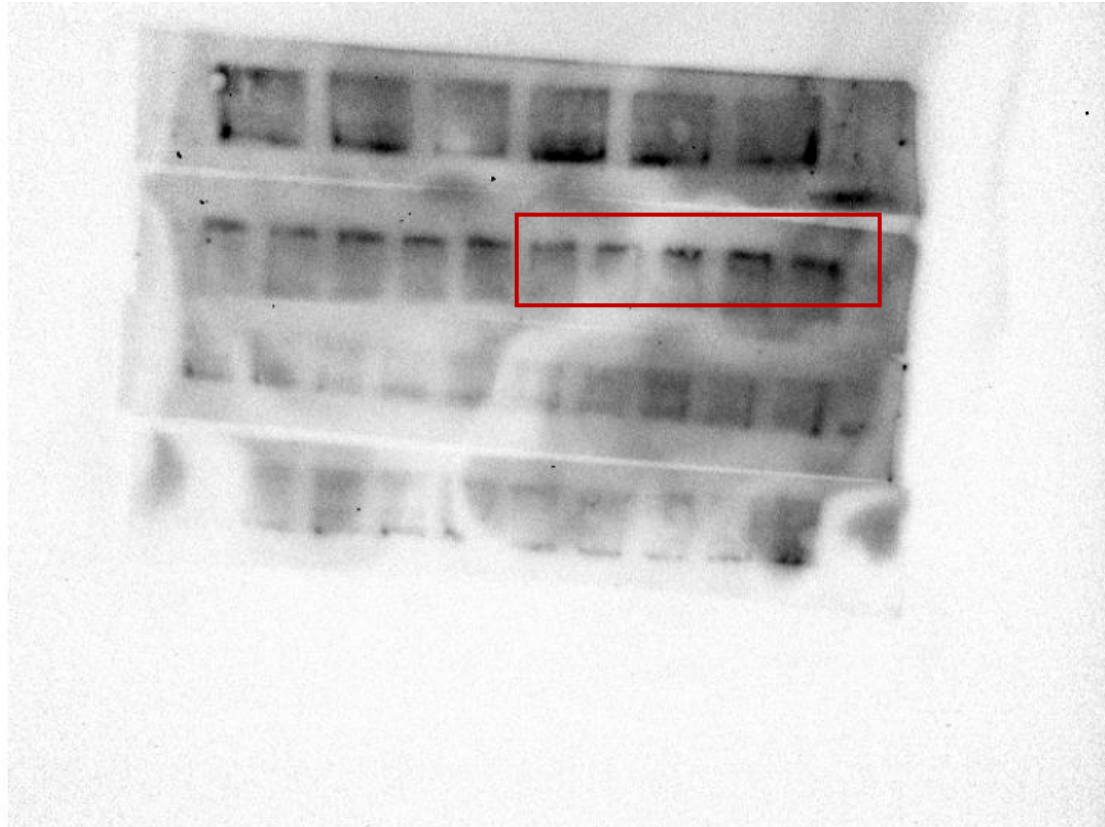

Figure 5A, p-PDGFR

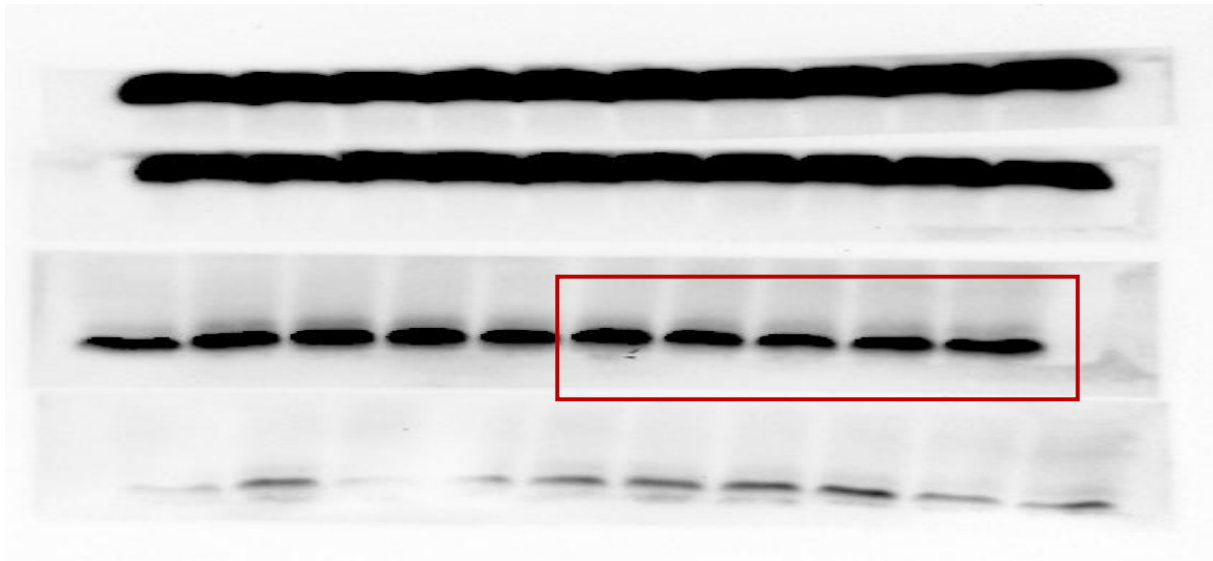

Figure 5A, PDGFR

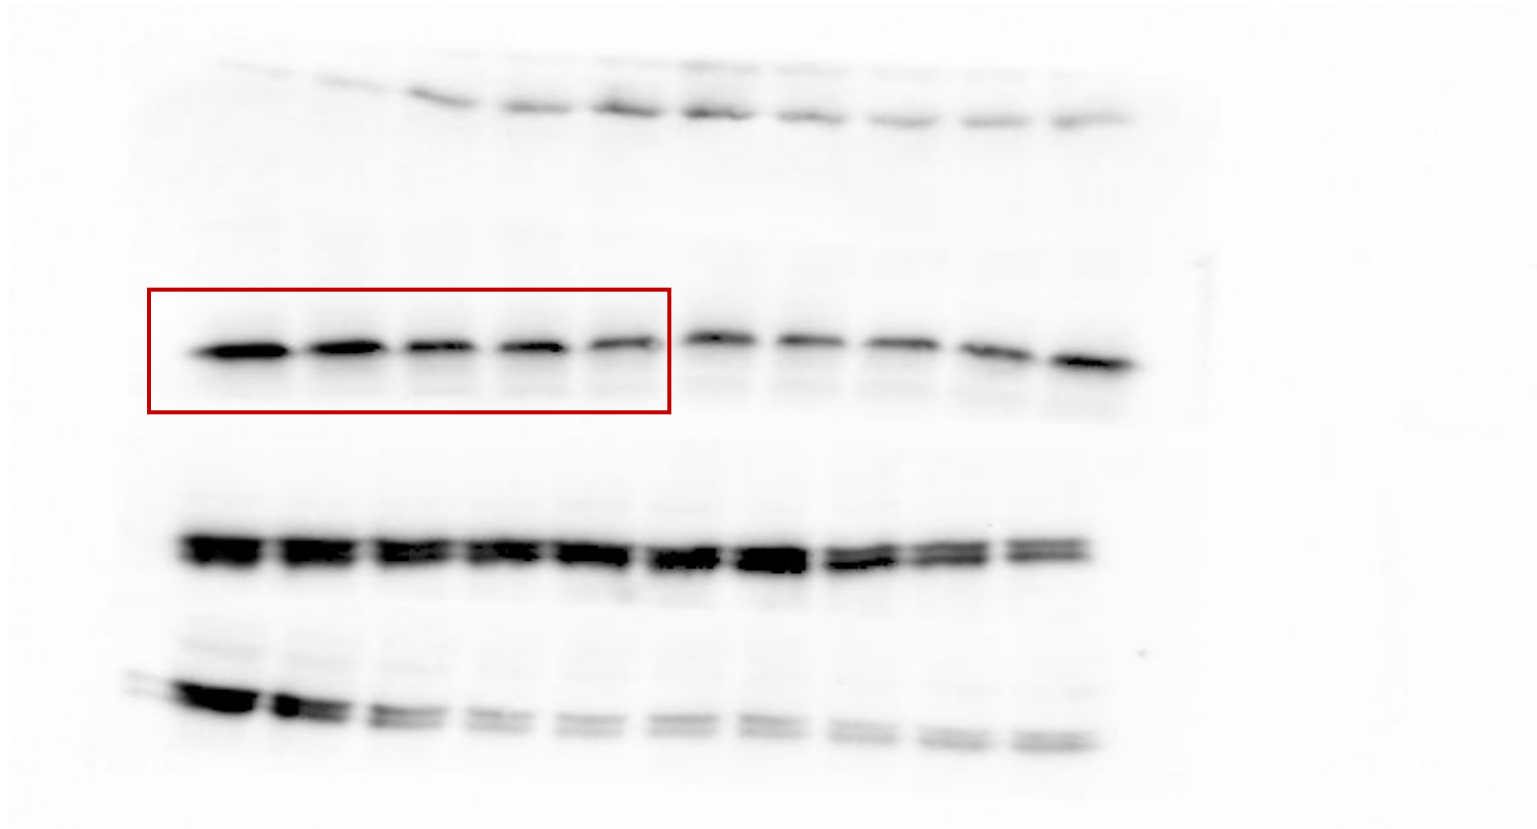

Figure 5A, p-PI3K

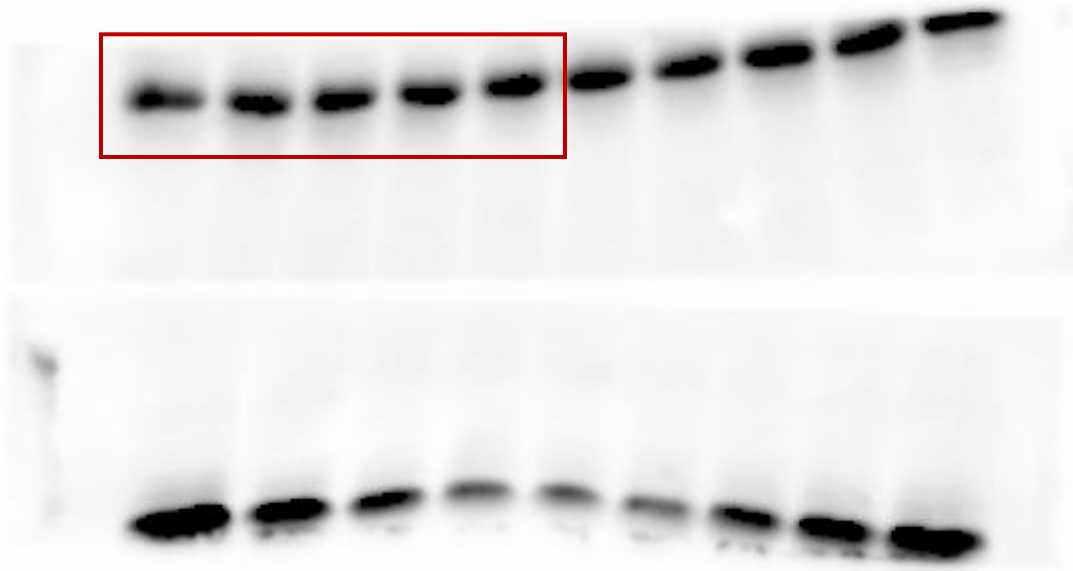

Figure 5A, PI3K

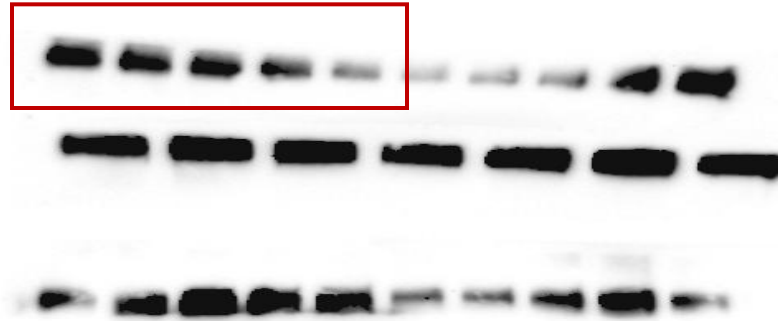

Figure 5A, p-AKT

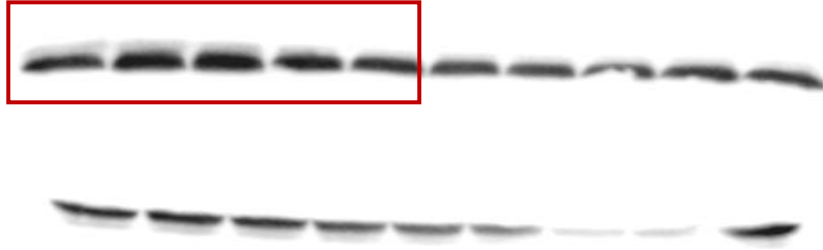

Figure 5A, AKT

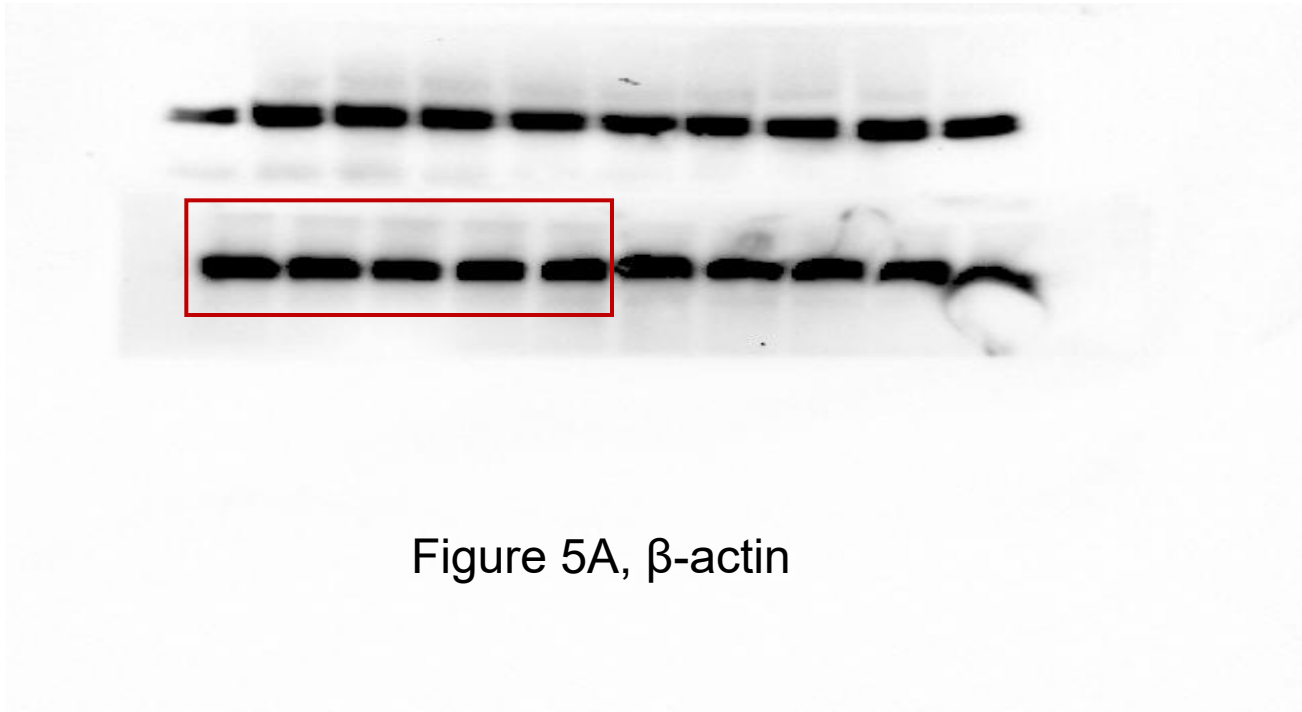

Figure 5A,  $\beta$ -actin

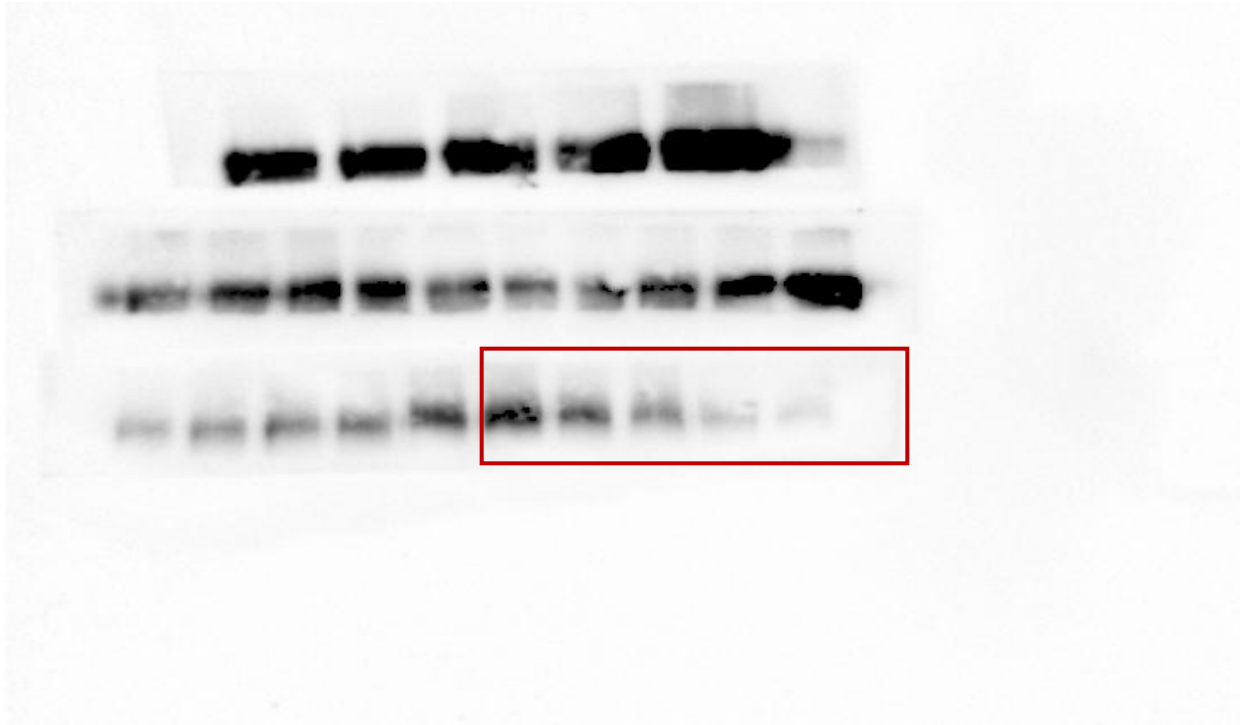

Figure 6F, PDGFR $\alpha$



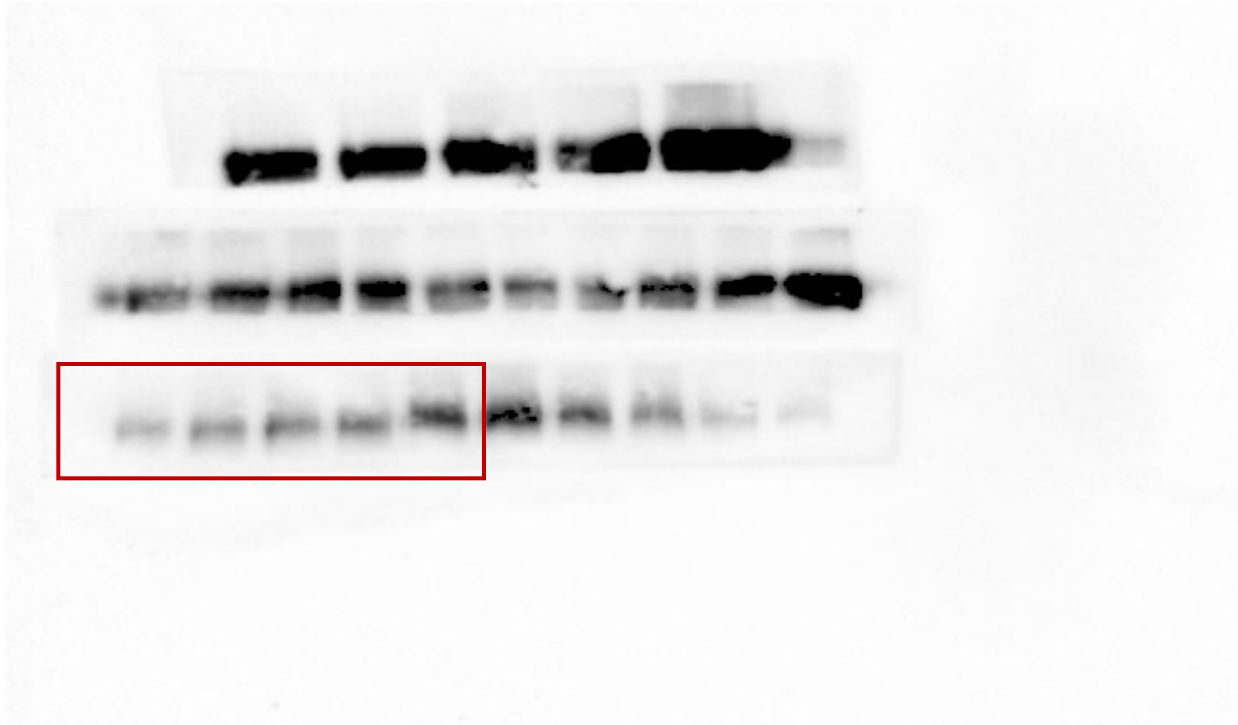

Figure 6F, PDGFR $\alpha$

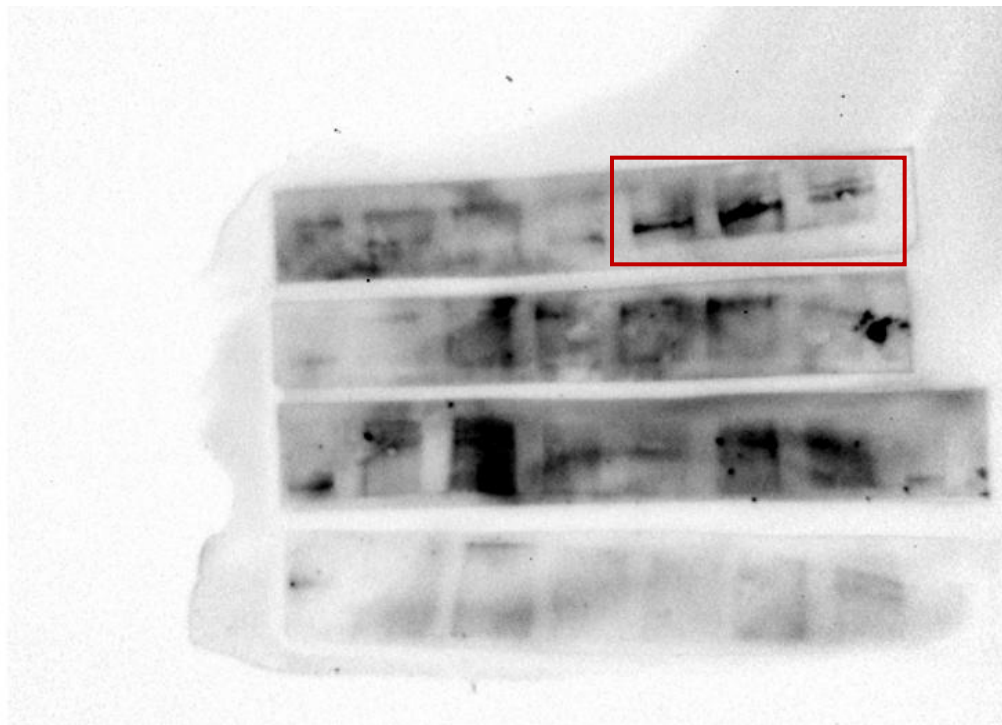

Figure 7E, p-PDGFR $\alpha$

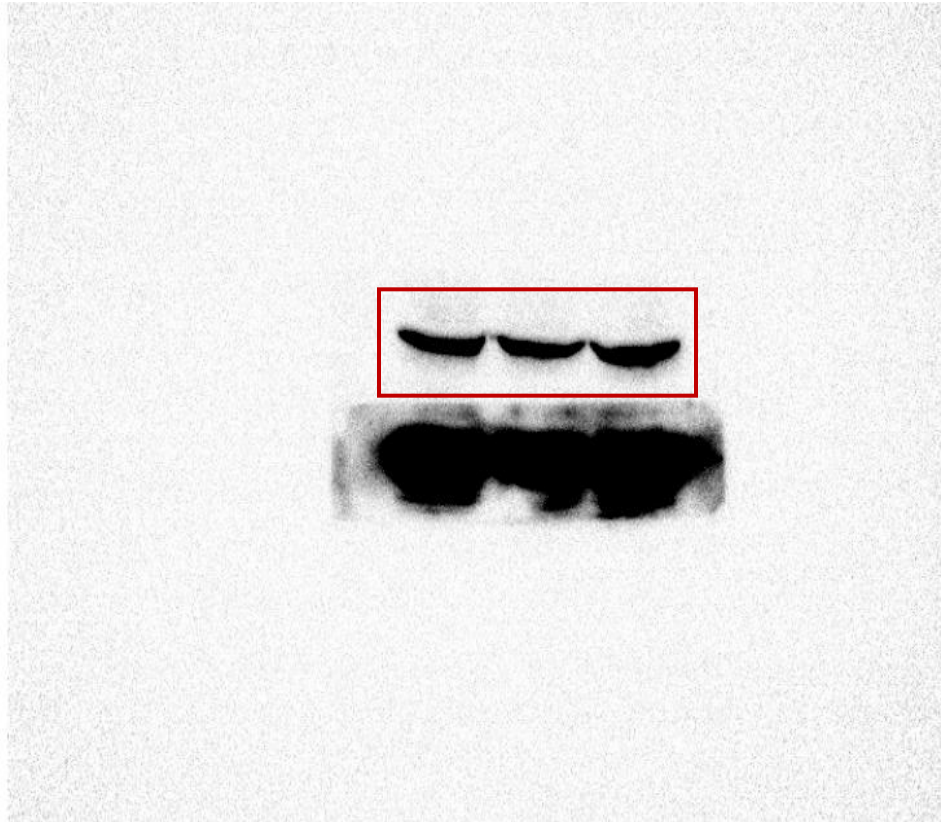

Figure 7E, PDGFR $\alpha$

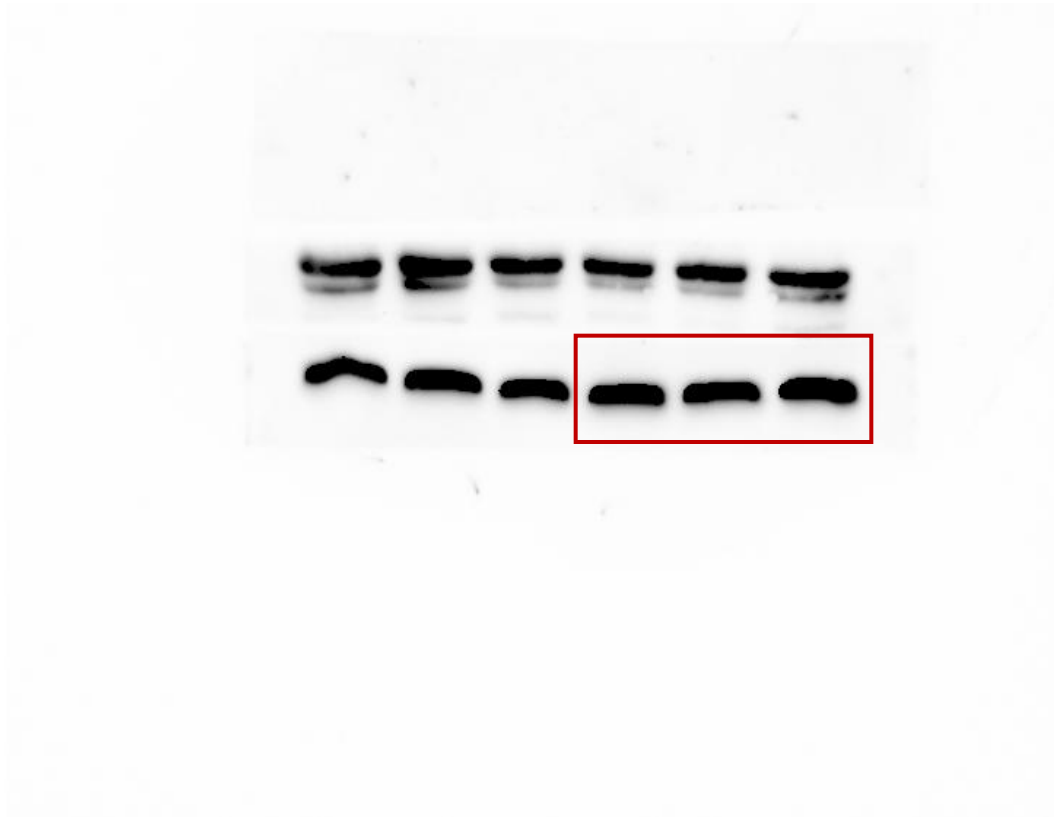

Figure 7E,  $\beta$ -actin

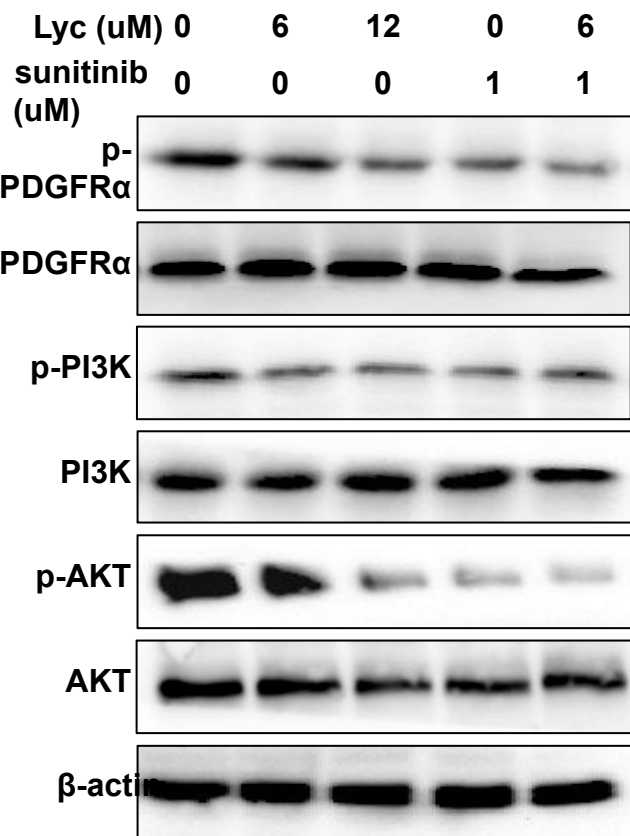

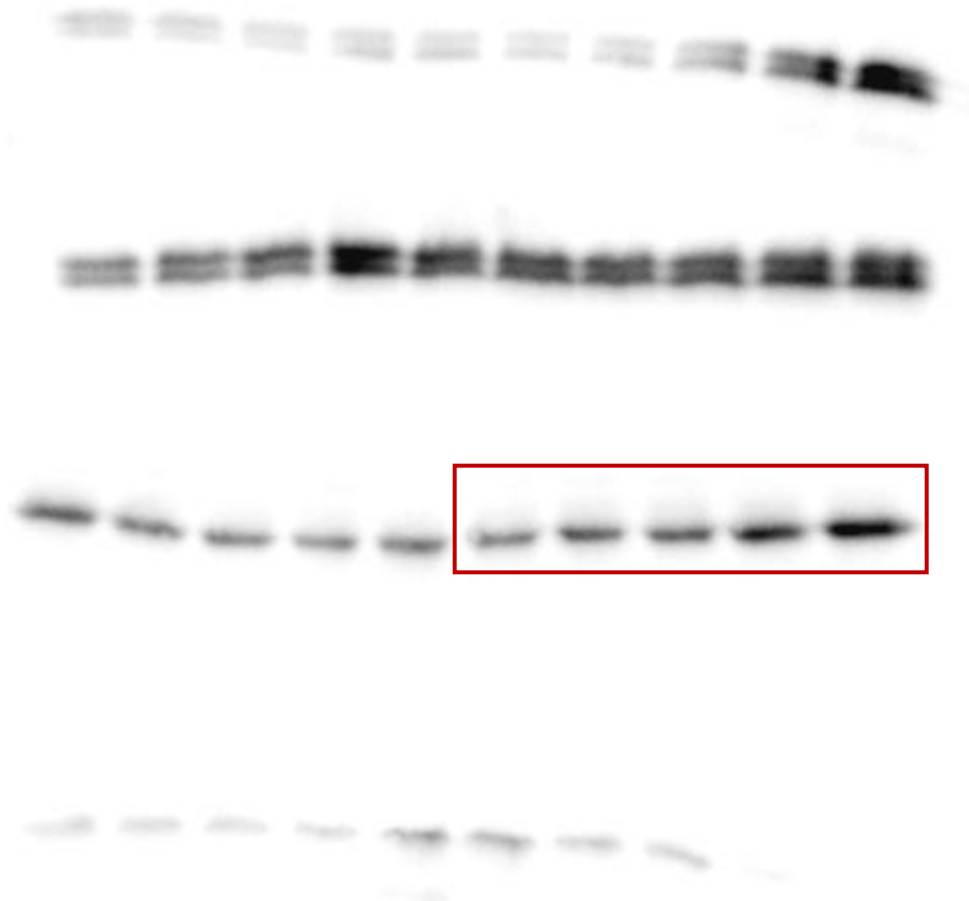

Figure 5A, replicates 1, p-PDGFR $\alpha$

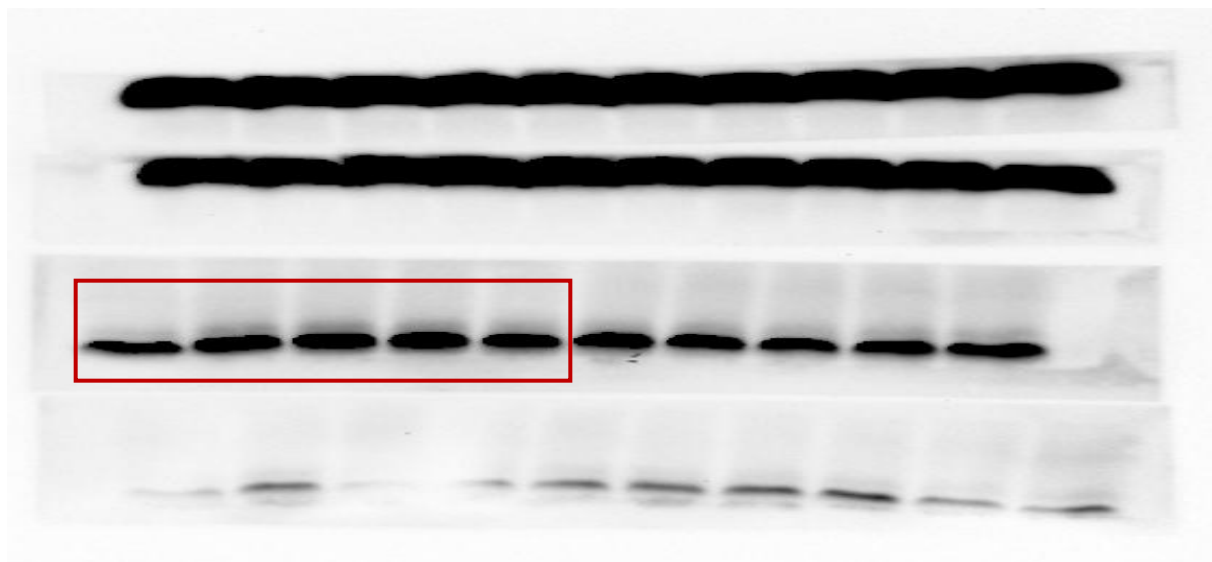

Figure 5A, replicates 1, PDGFR $\alpha$

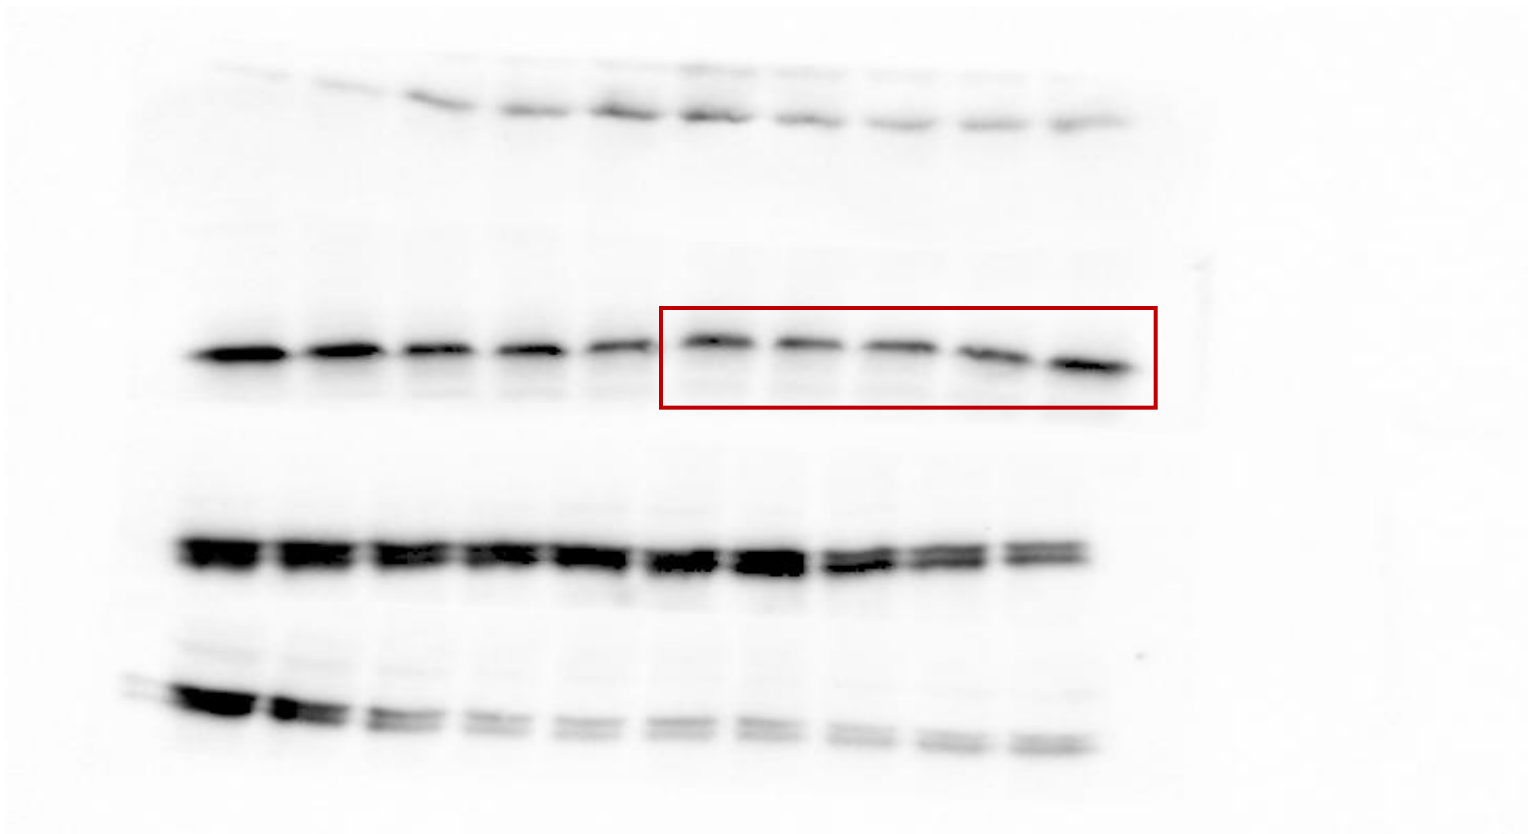

Figure 5A, replicates 1, p-PI3K



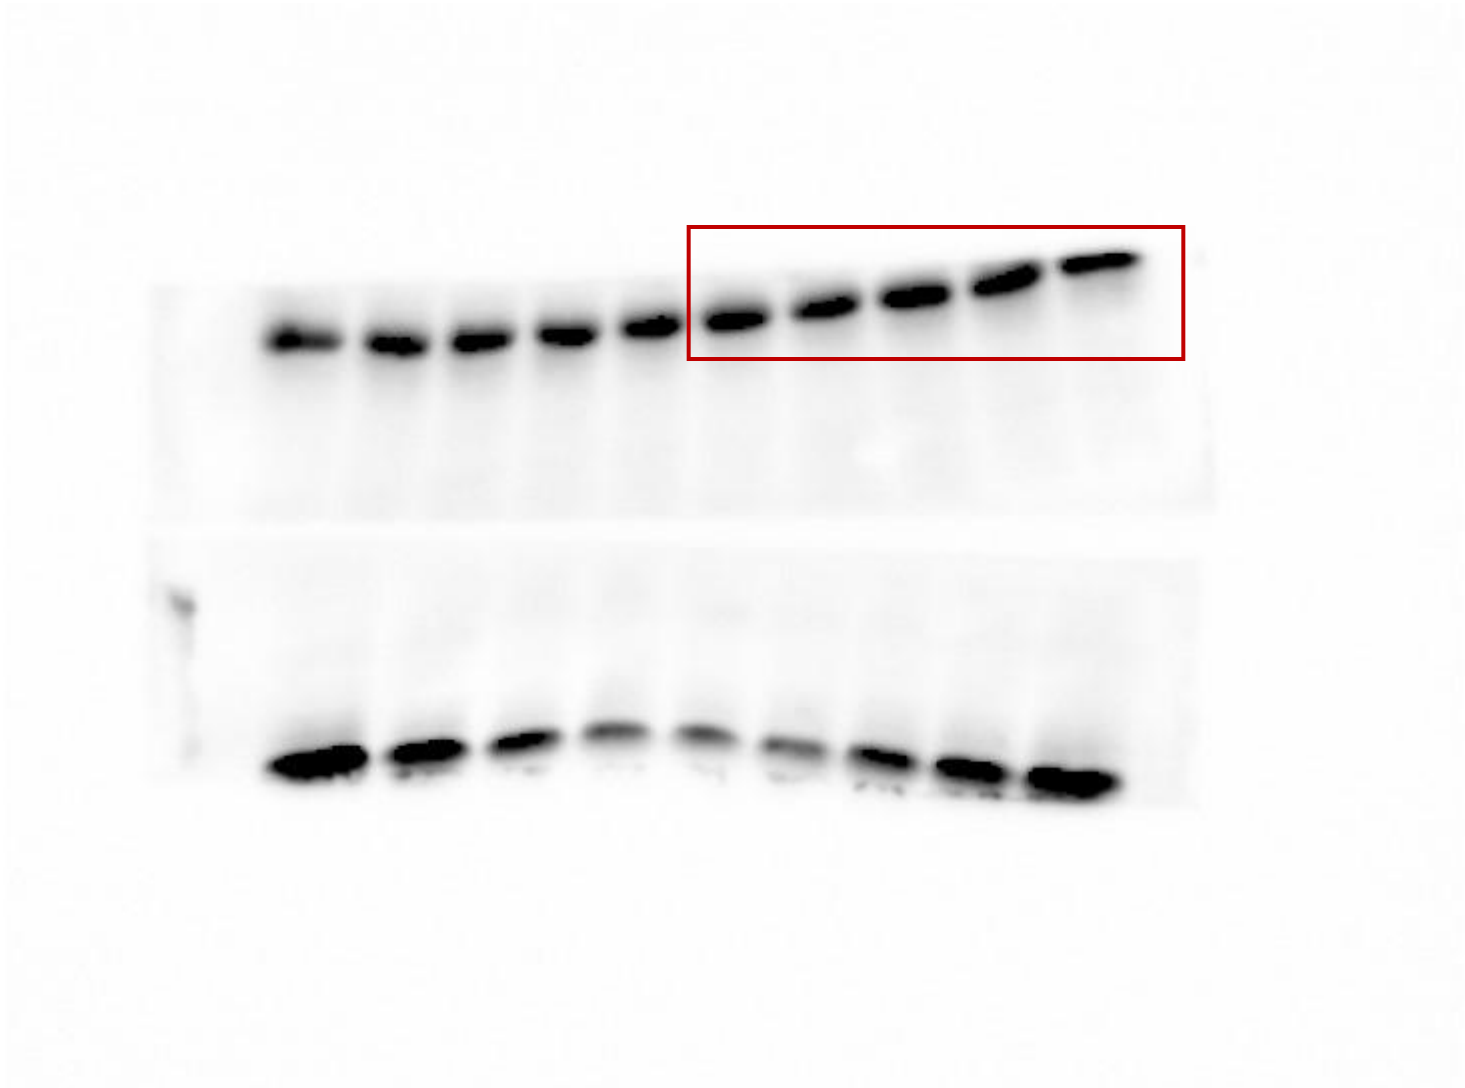

Figure 5A, replicates 1, PI3K

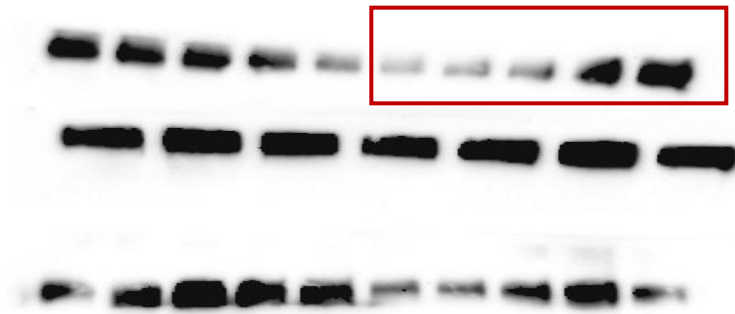

Figure 5A, replicates 1, p-AKT

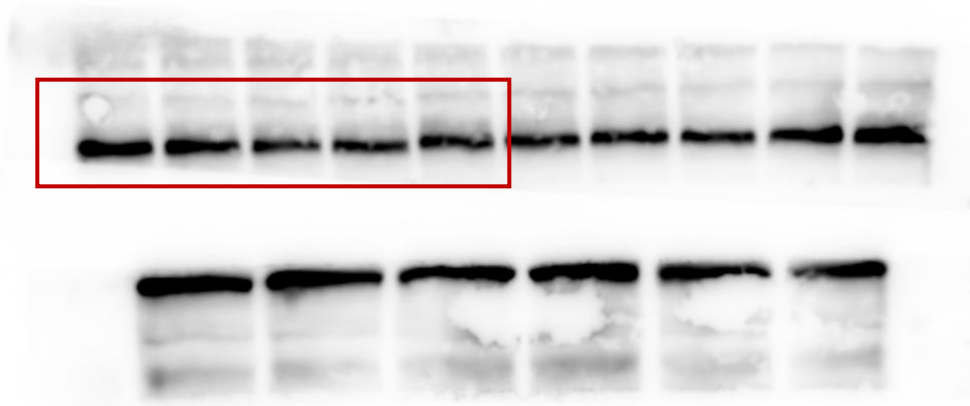

Figure 5A, replicates 1, AKT

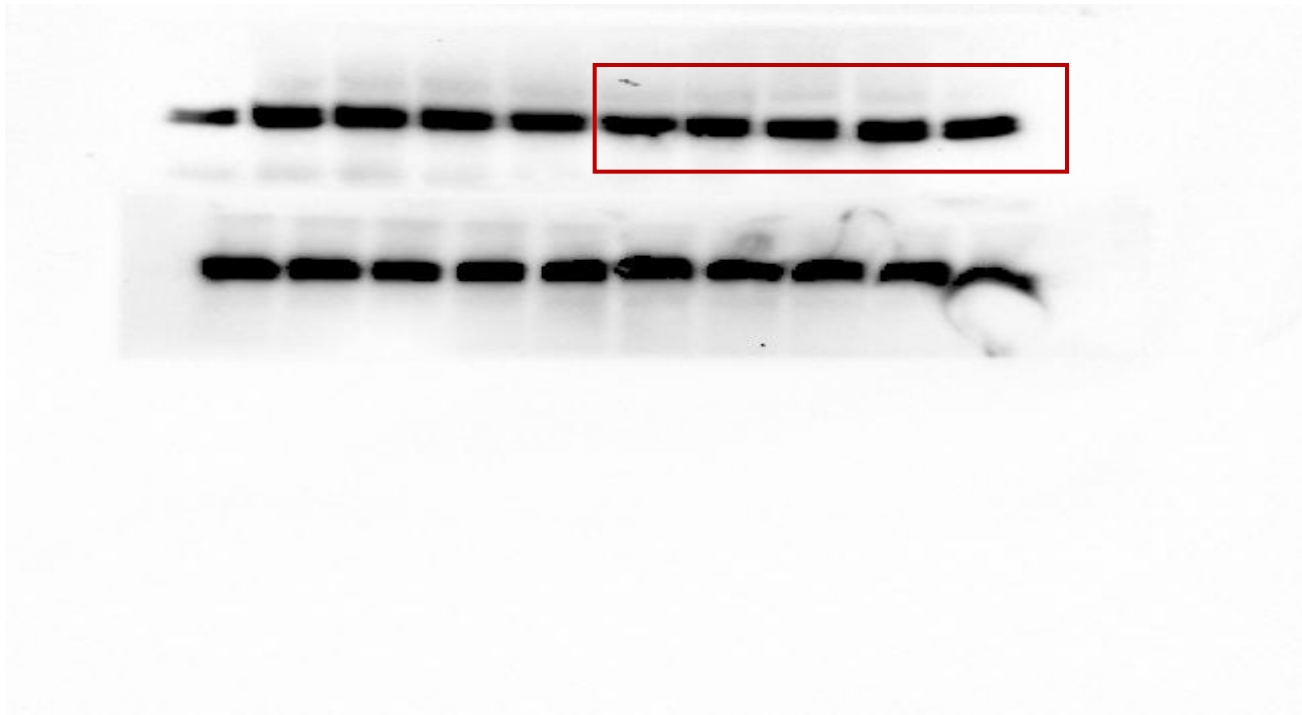

Figure 5A, replicates 1,  $\beta$ -actin

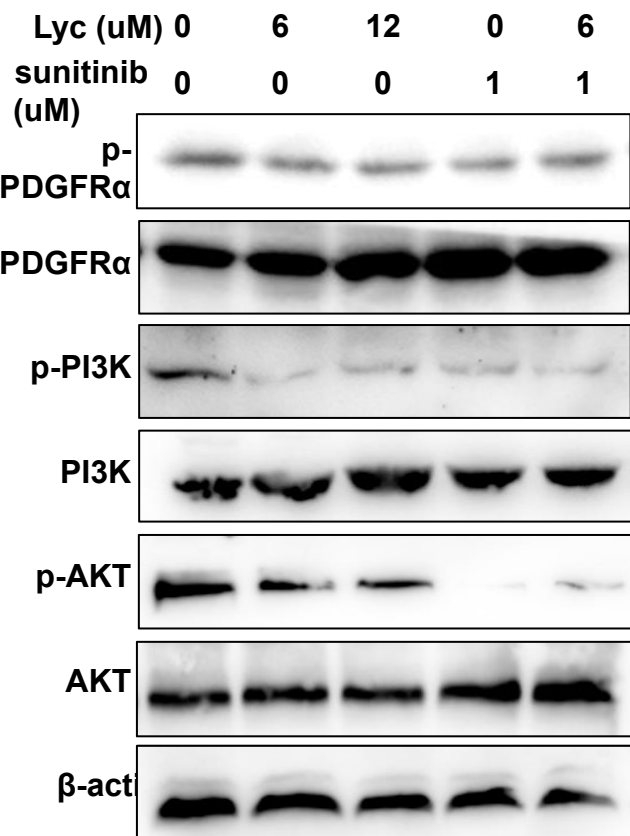

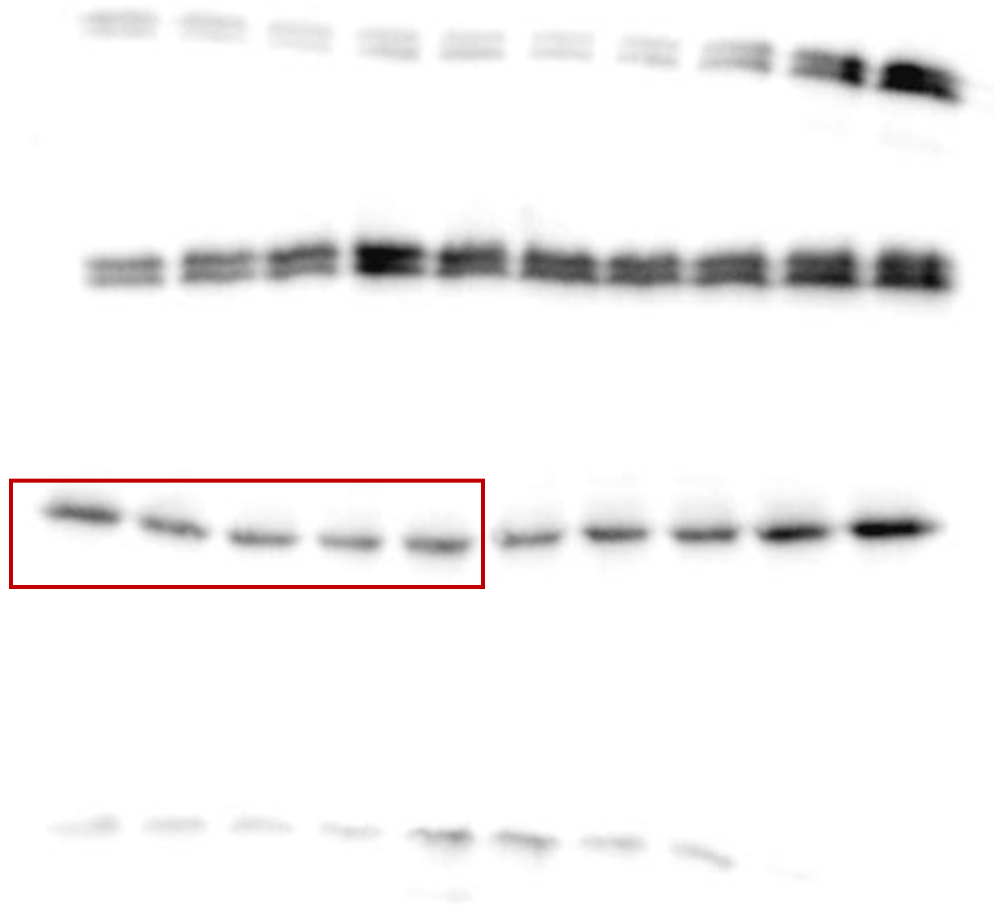

Figure 5A, replicates 2, p-PDGFR $\alpha$

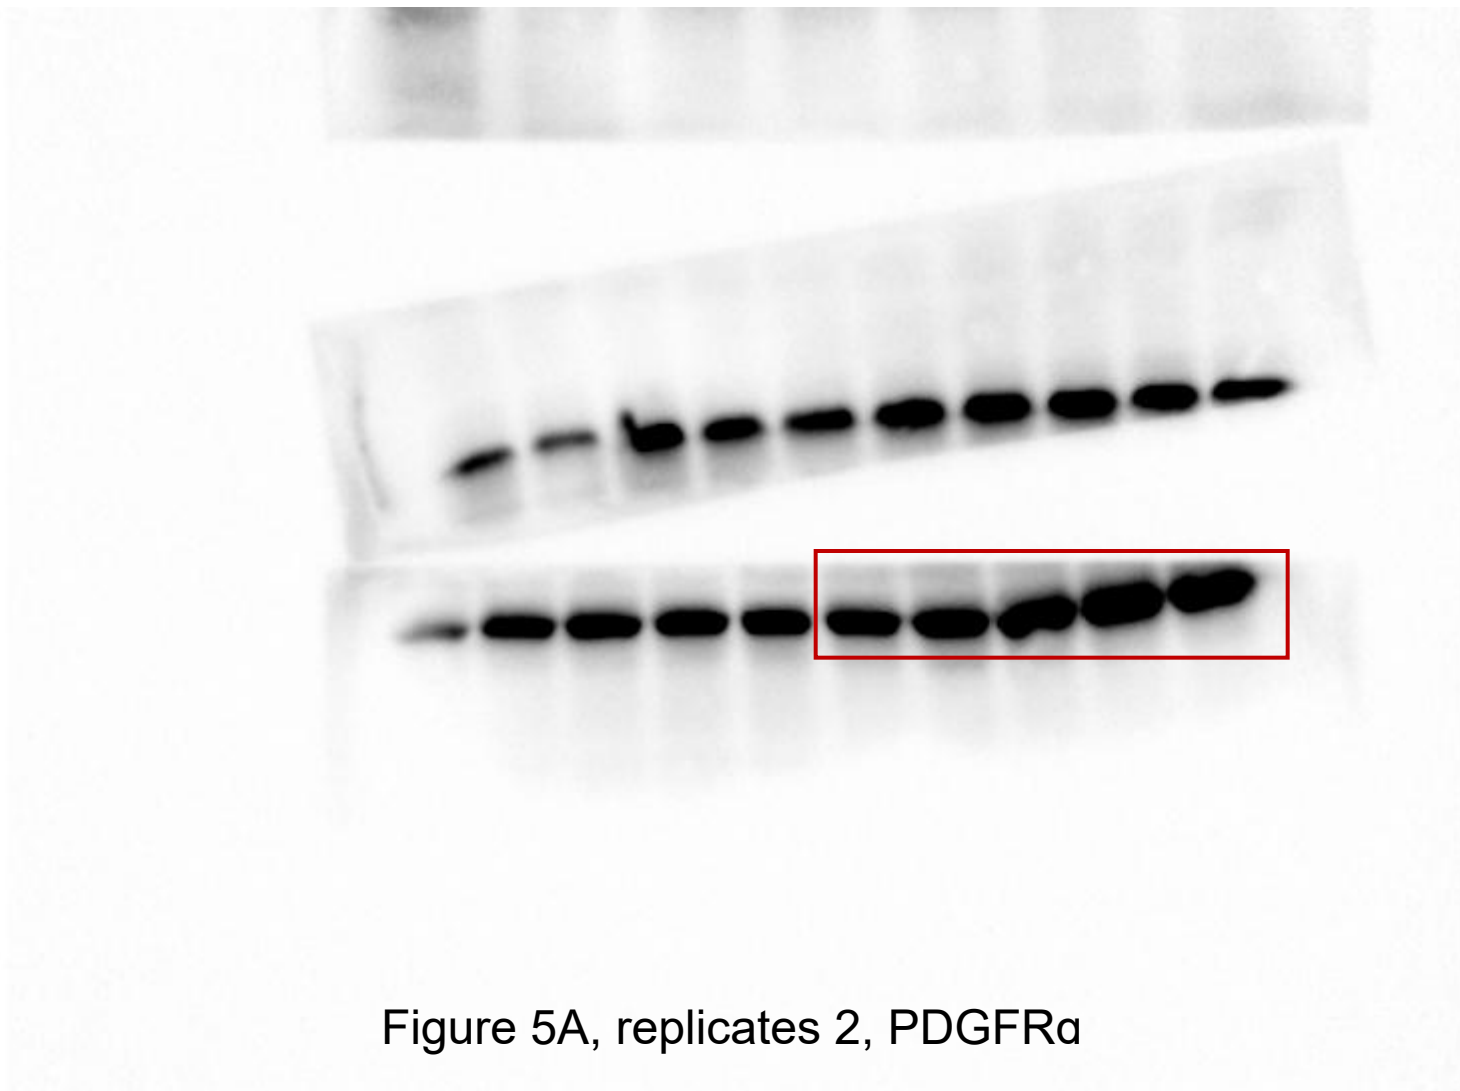

Figure 5A, replicates 2, PDGFR $\alpha$

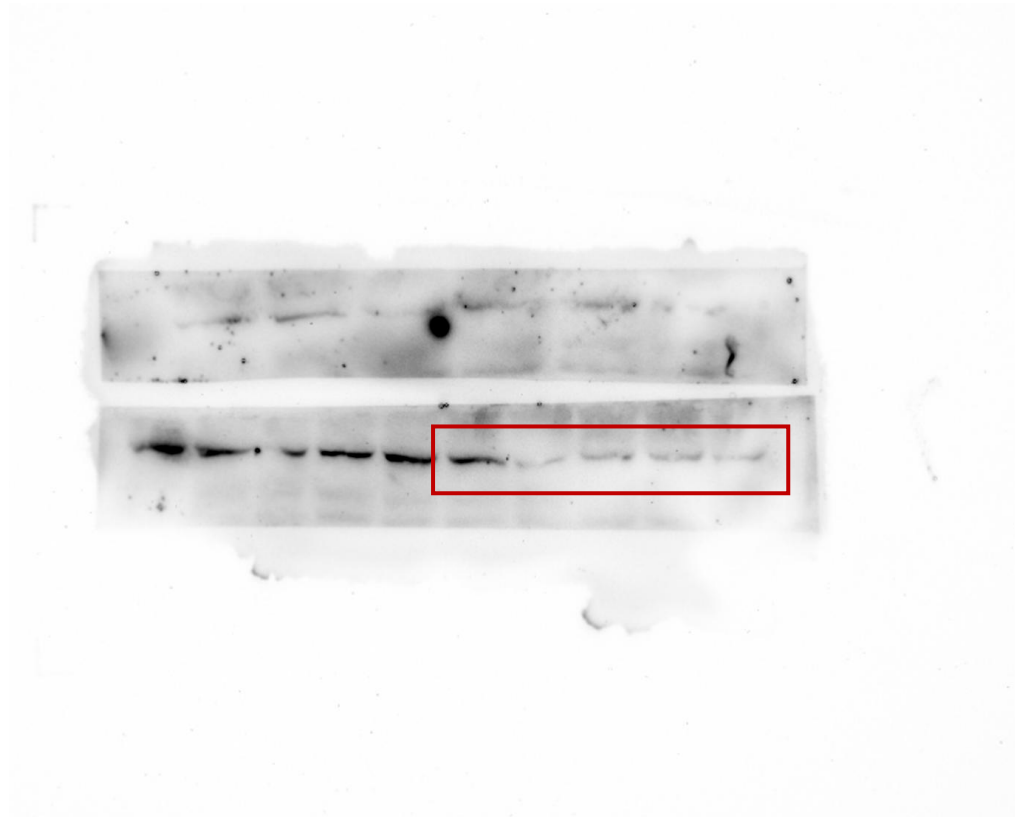

Figure 5A, replicates 2, p-PI3K



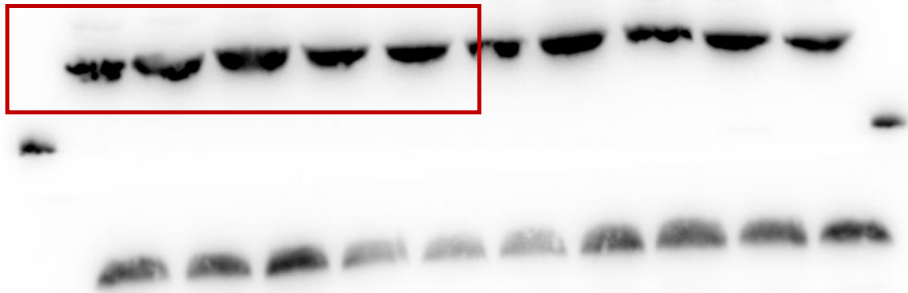

Figure 5A, replicates 2, PI3K

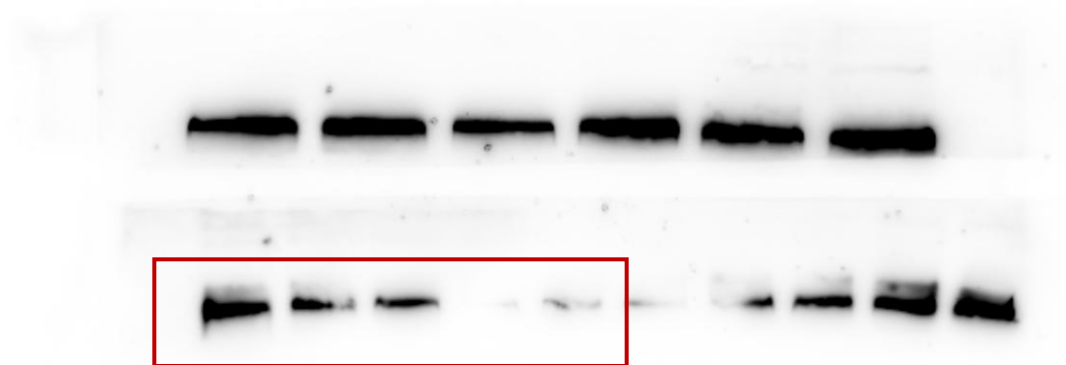

Figure 5A, replicates 2, p-AKT

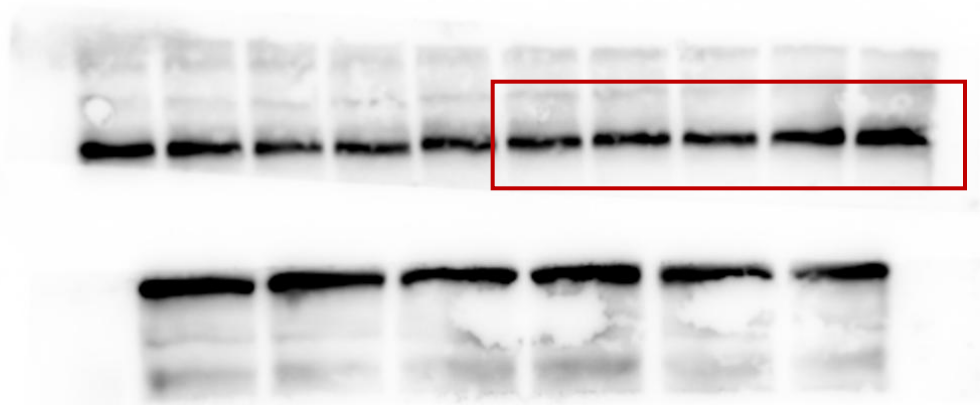

Figure 5A, replicates 2, AKT

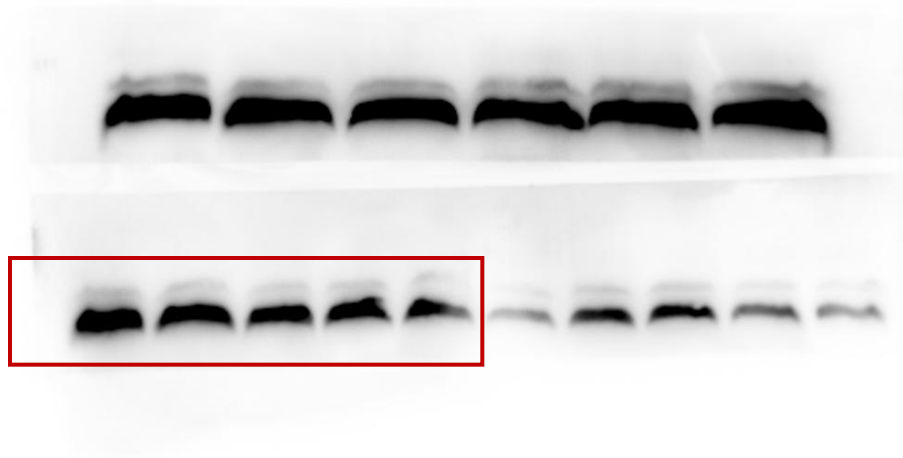

Figure 5A, replicates 2,  $\beta$ -actin

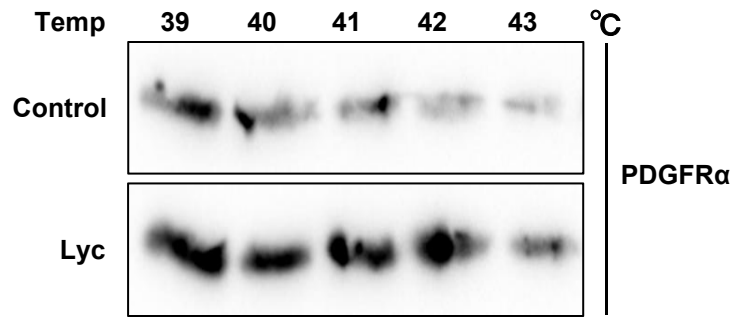

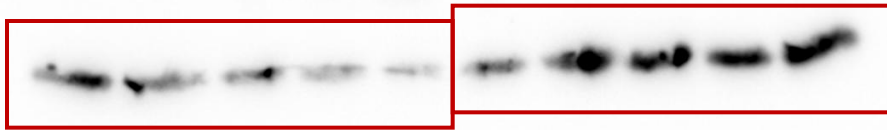

Figure 6F, replicates 1, pDGFR $\alpha$

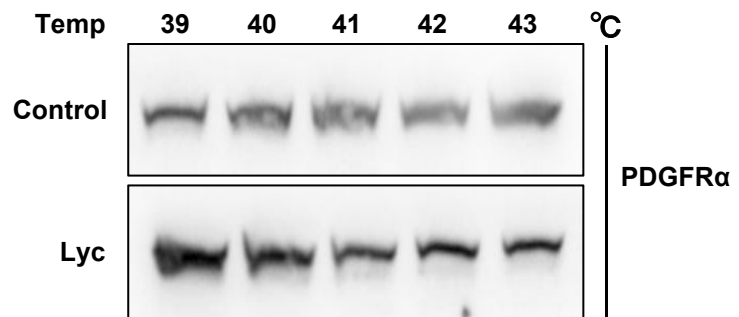

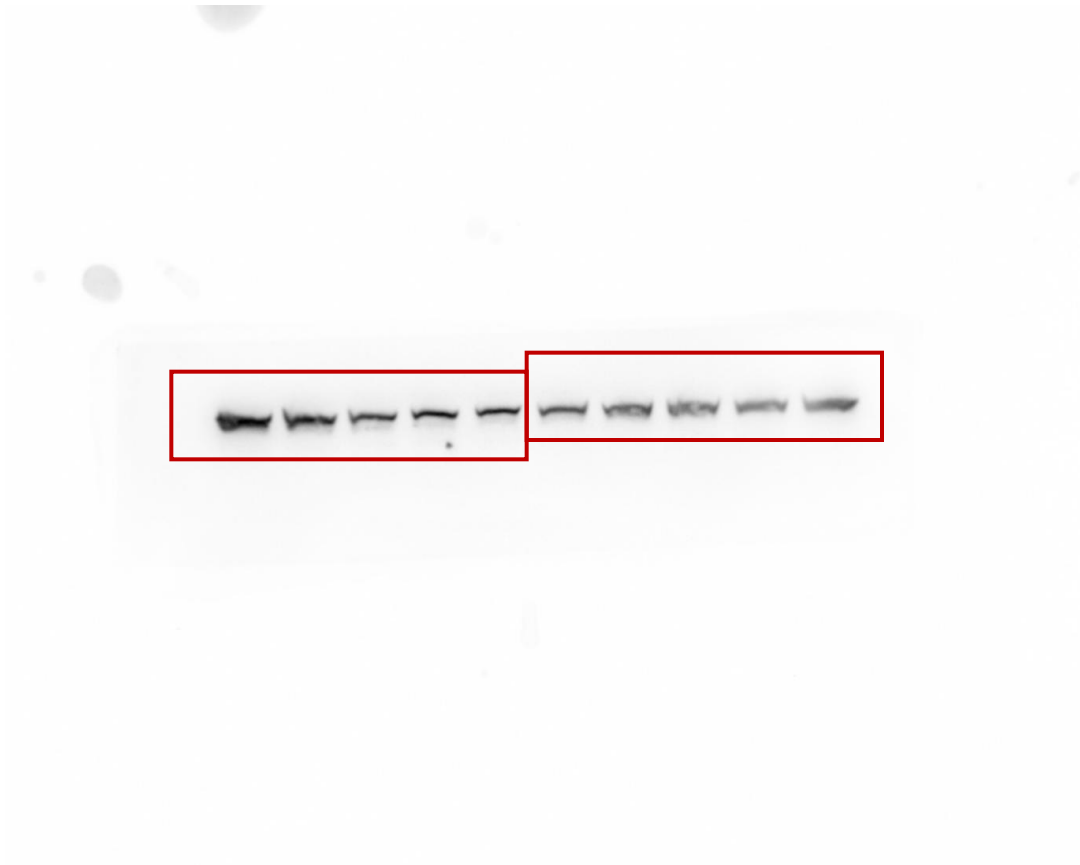

Figure 6F, replicates 2, pDGFR $\alpha$



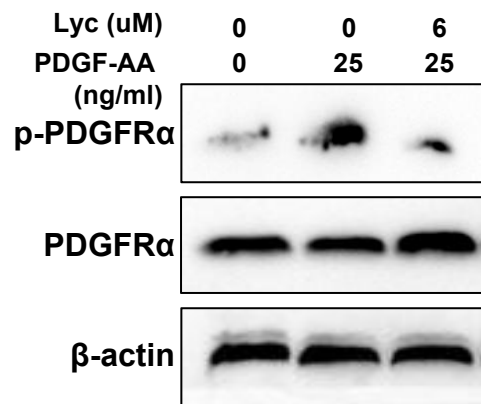

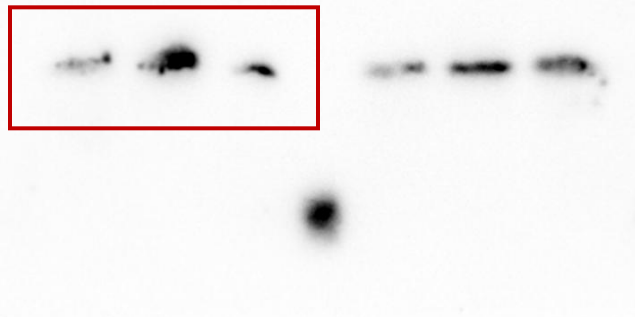

Figure 7E, replicates 1, p-PDGFR $\alpha$

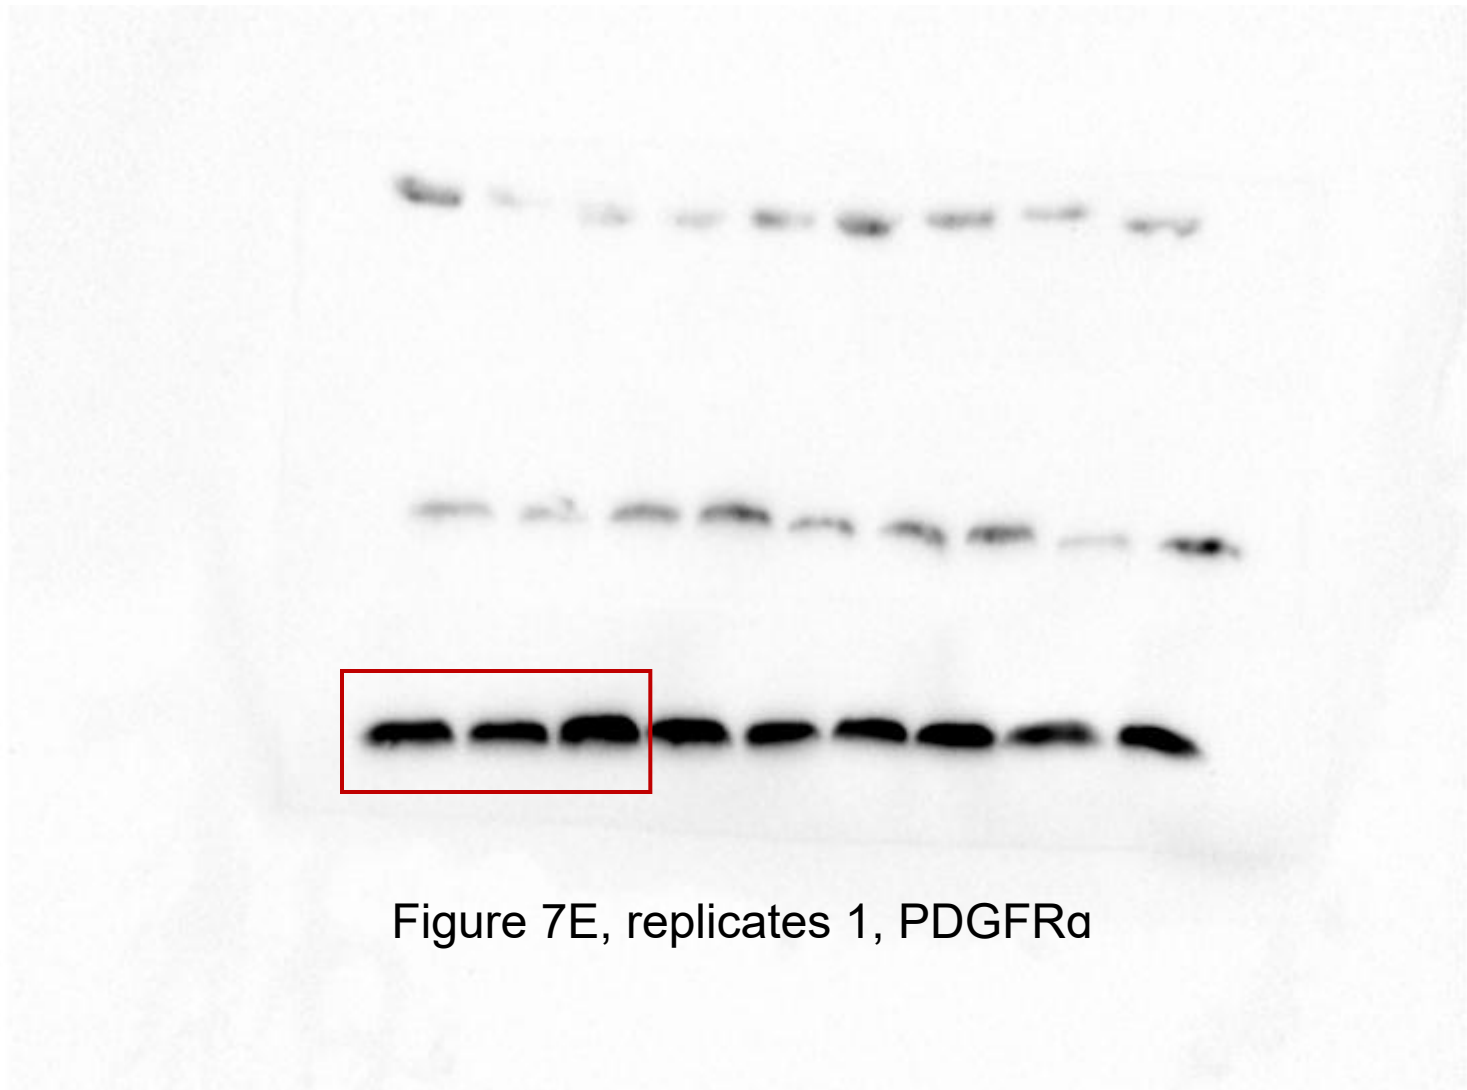

Figure 7E, replicates 1, PDGFR $\alpha$

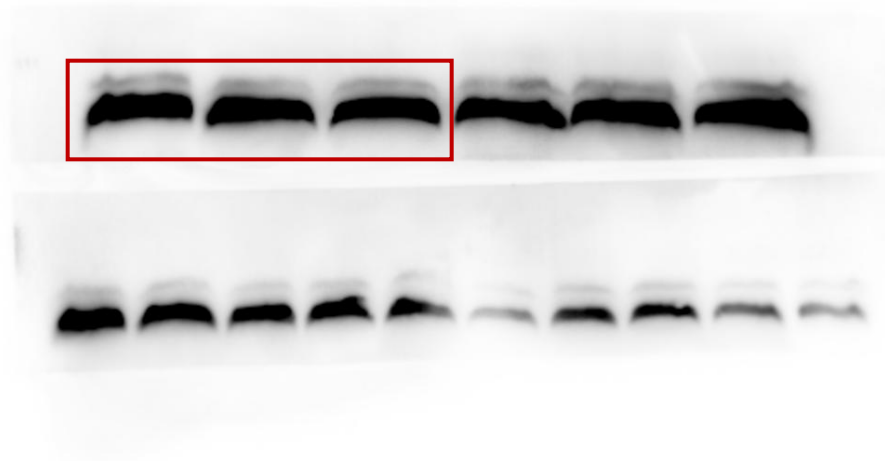

Figure 7E, replicates 1,  $\beta$ -actin

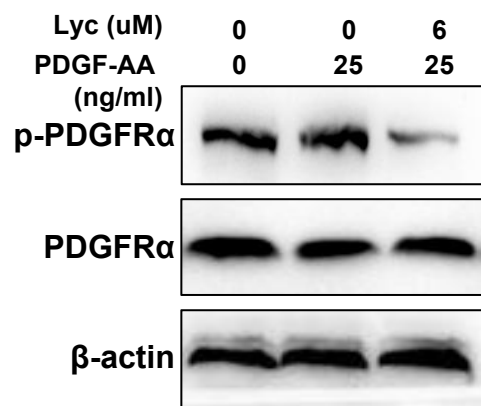

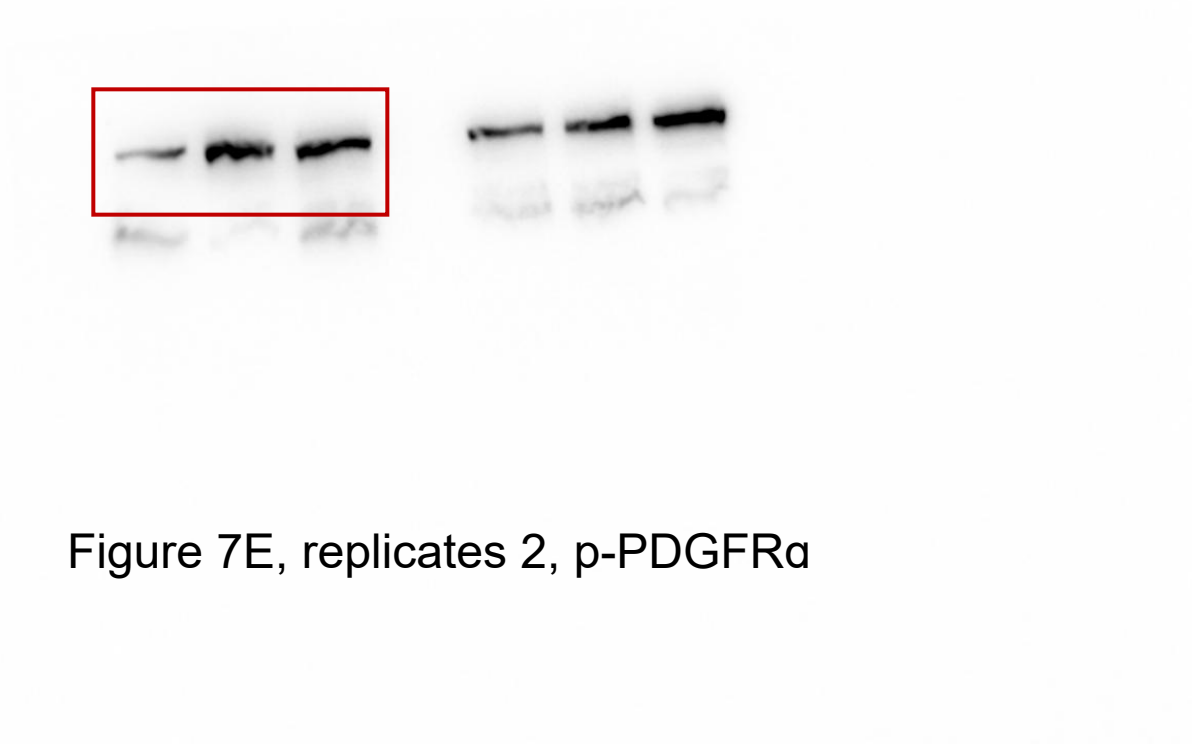

Figure 7E, replicates 2, p-PDGFR $\alpha$

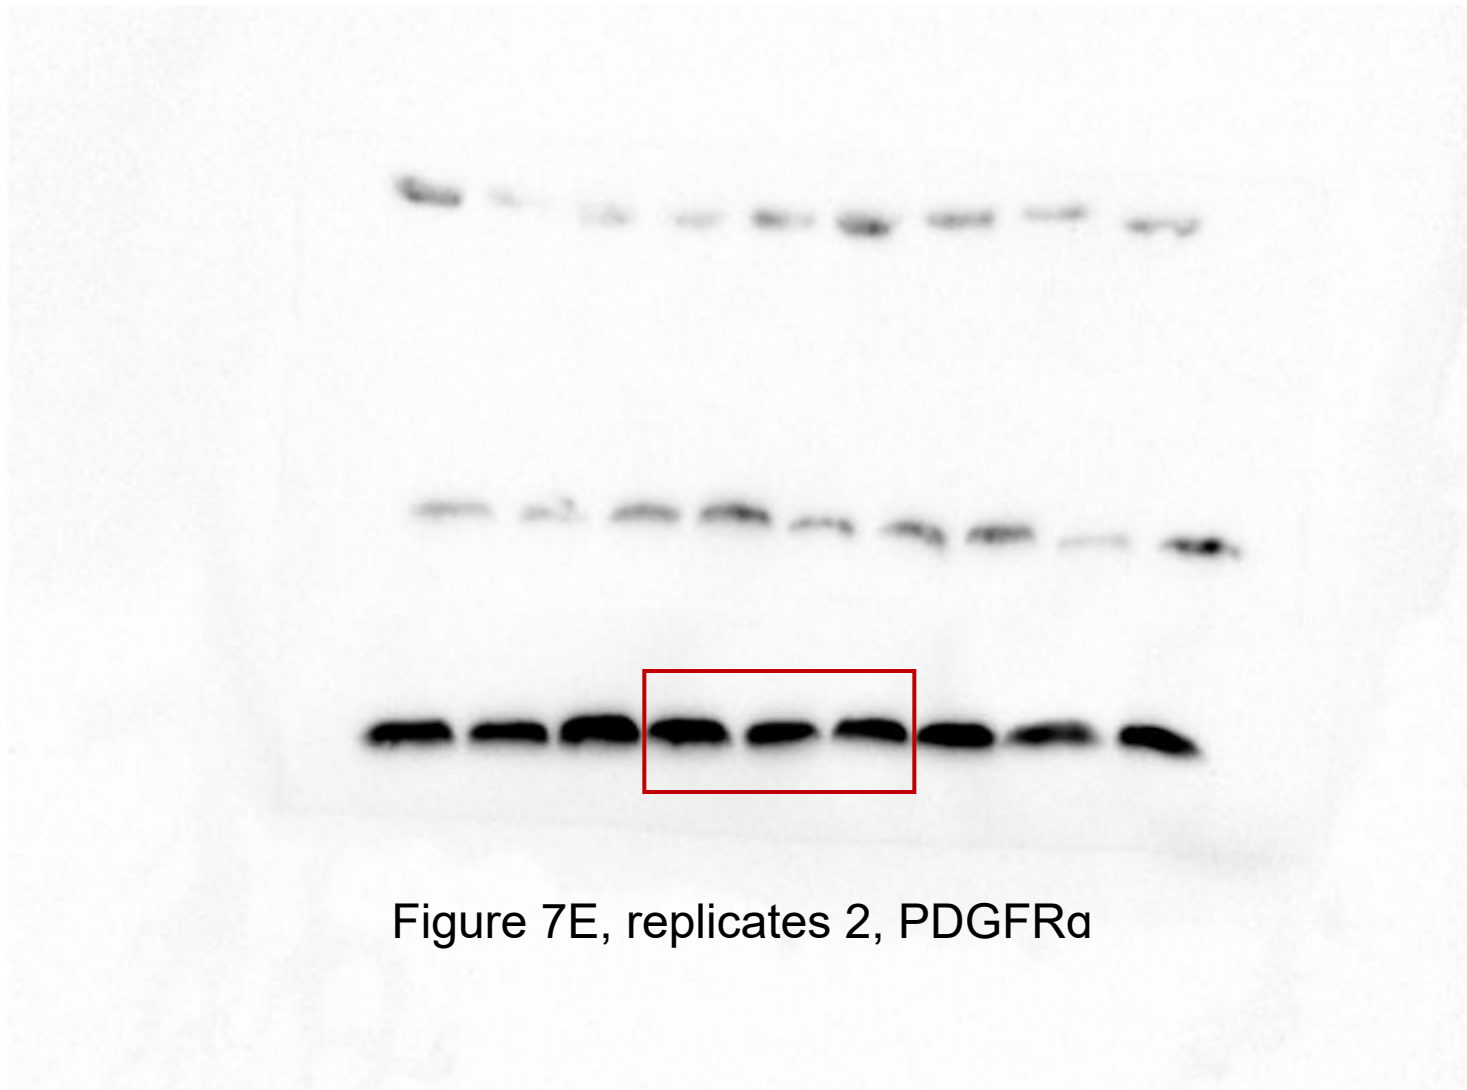

Figure 7E, replicates 2, PDGFR $\alpha$

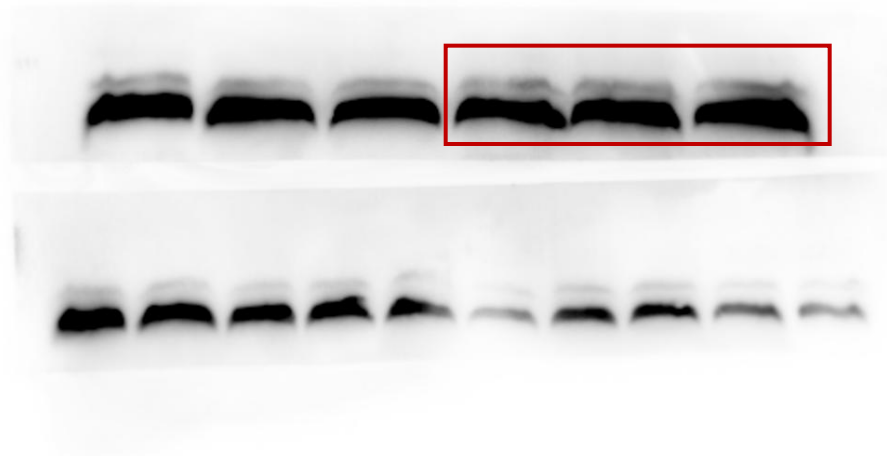

Figure 7E, replicates 2,  $\beta$ -actin
